# Supplementary material for: Viral respiratory infections and the oropharyngeal bacterial microbiota in acutely wheezing children
Source: PubMed Central journal article supplement (PMC6797130; doi:10.1371/journal.pone.0223990), 2019-10-17

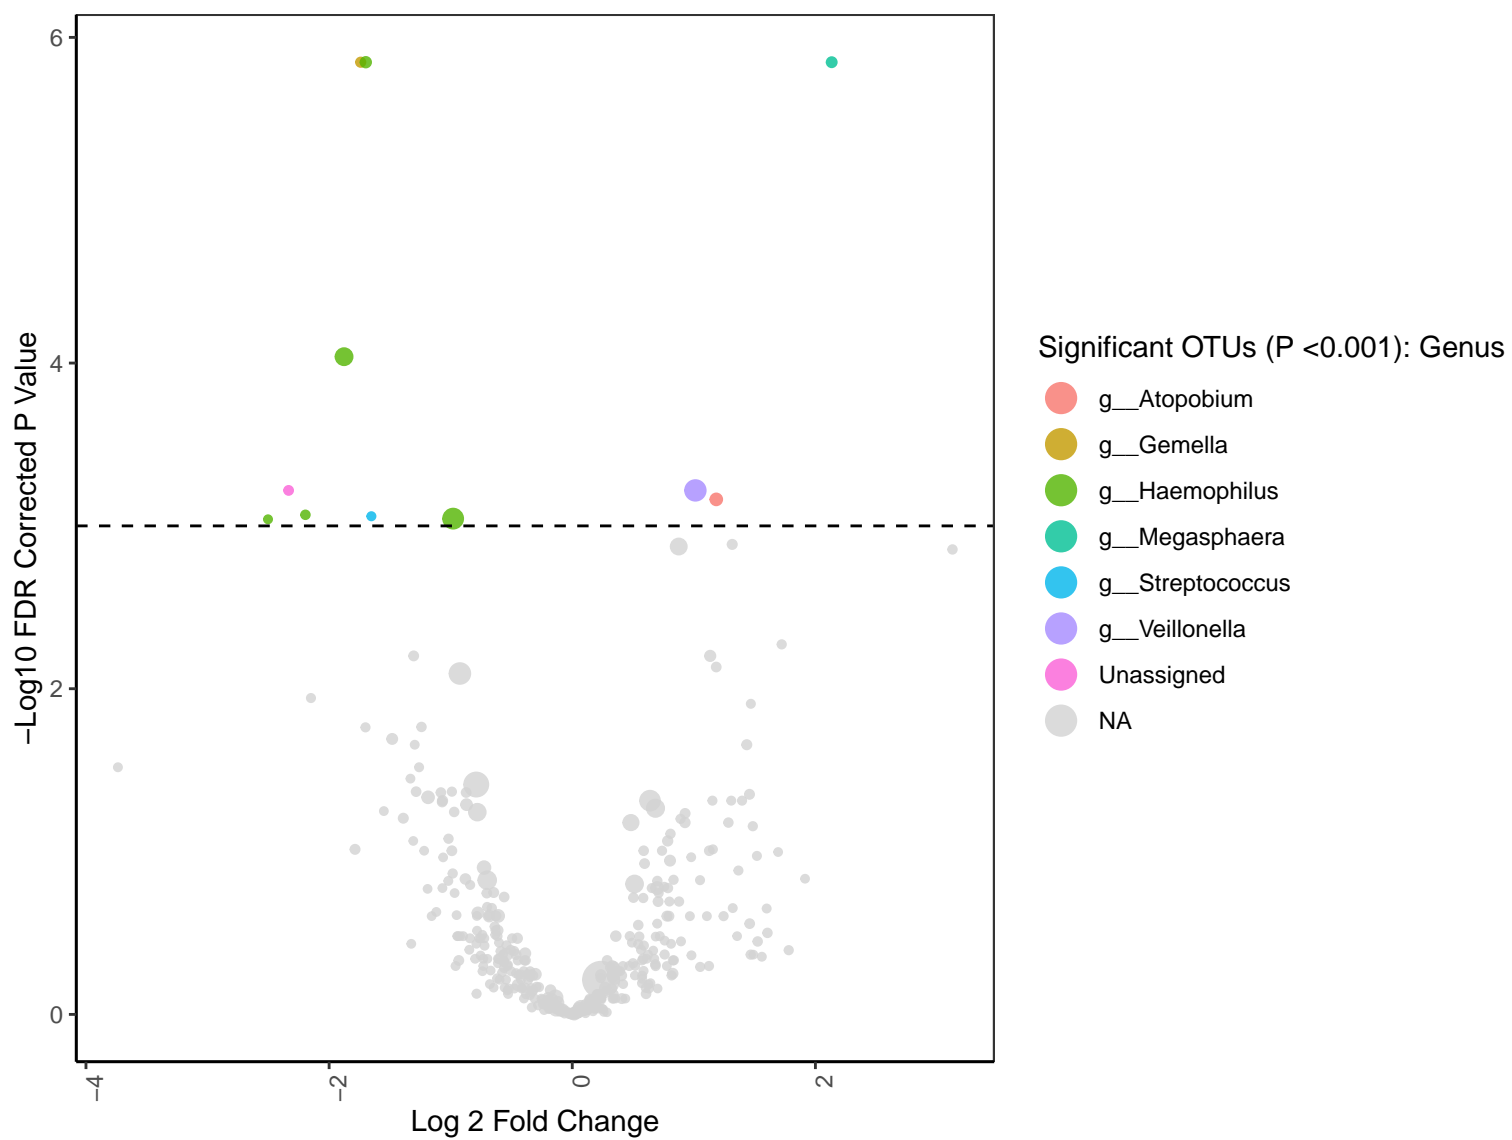

Supplement: pone.0223990.s009.pdf [file pone.0223990.s009.pdf]
